# Supplementary material
Source: PubMed Central journal article supplement (PMC5712493)
Supplement: NIHMS922794-supplement-Supp_Table_1.pdf [file NIHMS922794-supplement-Supp_Table_1.pdf]

## Supplementary Information

### Tables

**Table SII.** Number of cases and sampled sequences per region and country, where ‘Admin’ is the name of the administrative level used (‘prefect.’ being prefecture and ‘depart.’ being departement) and ‘Sampling’ is sequences/cases  $\times$  100.

| Country | Name        | Admin.   | Population | Sequences | Cases | Sampling |
|---------|-------------|----------|------------|-----------|-------|----------|
| GIN     | Beyla       | prefect. | 218,698    | 4         | 52    | 7.69     |
| GIN     | Boffa       | prefect. | 195,019    | 0         | 52    | 0        |
| GIN     | Boké        | prefect. | 465,824    | 18        | 36    | 50       |
| GIN     | Conakry     | prefect. | 1,513,554  | 73        | 630   | 11.61    |
| GIN     | Coyah       | prefect. | 108,104    | 26        | 258   | 10.12    |
| GIN     | Dabola      | prefect. | 156,599    | 0         | 15    | 0        |
| GIN     | Dalaba      | prefect. | 178,343    | 3         | 10    | 30       |
| GIN     | Dinguiraye  | prefect. | 178,550    | 0         | 1     | 0        |
| GIN     | Dubréka     | prefect. | 273,945    | 22        | 167   | 13.17    |
| GIN     | Faranah     | prefect. | 187,820    | 8         | 88    | 9.09     |
| GIN     | Forécariah  | prefect. | 389,052    | 60        | 503   | 11.95    |
| GIN     | Fria        | prefect. | 115,696    | 3         | 16    | 18.75    |
| GIN     | Gaoual      | prefect. | 171,616    | 0         | 0     | NA       |
| GIN     | Guéckédou   | prefect. | 720,289    | 58        | 390   | 14.87    |
| GIN     | Kankan      | prefect. | 374,445    | 4         | 38    | 10.53    |
| GIN     | Kérouané    | prefect. | 259,648    | 10        | 176   | 5.68     |
| GIN     | Kindia      | prefect. | 466,987    | 2         | 132   | 1.53     |
| GIN     | Kissidougou | prefect. | 275,182    | 18        | 138   | 13.04    |
| GIN     | Koubia      | prefect. | 111,176    | 0         | 0     | NA       |
| GIN     | Koundara    | prefect. | 108,639    | 0         | 0     | NA       |
| GIN     | Kouroussa   | prefect. | 197,242    | 2         | 22    | 9.09     |
| GIN     | Labé        | prefect. | 313,715    | 0         | 0     | NA       |
| GIN     | Lélouma     | prefect. | 144,433    | 0         | 0     | NA       |
| GIN     | Lola        | prefect. | 214,082    | 2         | 118   | 1.69     |
| GIN     | Macenta     | prefect. | 495,845    | 40        | 787   | 5.1      |
| GIN     | Mali        | prefect. | 208,339    | 0         | 5     | 0        |
| GIN     | Mamou       | prefect. | 371,426    | 0         | 0     | NA       |
| GIN     | Mandiana    | prefect. | 252,272    | 0         | 0     | NA       |
| GIN     | Nzérékoré   | prefect. | 372,266    | 9         | 269   | 3.35     |
| GIN     | Pita        | prefect. | 263,471    | 0         | 8     | 0        |
| GIN     | Siguiri     | prefect. | 427,947    | 3         | 38    | 7.89     |
| GIN     | Télimélé    | prefect. | 258,398    | 0         | 43    | 0        |
| GIN     | Tougué      | prefect. | 152,448    | 0         | 2     | 0        |
| GIN     | Yamou       | prefect. | 300,674    | 0         | 12    | 0        |
| LBR     | Bomi        | county   | 124,080    | 5         | 220   | 2.27     |
| LBR     | Bong        | county   | 334,921    | 2         | 219   | 0.91     |
| LBR     | Gbapolu     | county   | 91,366     | 1         | 28    | 3.57     |

|     | LBR              | GrandBassa | county    | 219,024 | 14   | 164   | 8.54 |
|-----|------------------|------------|-----------|---------|------|-------|------|
| LBR | Grand Cape Mount | county     | 132,777   | 4       | 207  | 1.93  |      |
| LBR | GrandGedeh       | county     | 127,295   | 0       | 4    | 0     |      |
| LBR | GrandKru         | county     | 64,797    | 2       | 25   | 8     |      |
| LBR | Lofa             | county     | 287,555   | 13      | 511  | 2.54  |      |
| LBR | Margibi          | county     | 335,736   | 21      | 878  | 2.39  |      |
| LBR | Maryland         | county     | 132,024   | 0       | 7    | 0     |      |
| LBR | Montserrado      | county     | 1,016,221 | 67      | 2925 | 2.29  |      |
| LBR | Nimba            | county     | 483,036   | 5       | 282  | 1.77  |      |
| LBR | River Cess       | county     | 73,960    | 2       | 48   | 4.17  |      |
| LBR | River Gee        | county     | 83,020    | 1       | 13   | 7.69  |      |
| LBR | Sinoe            | county     | 103,789   | 3       | 33   | 9.09  |      |
| SLE | Bo               | district   | 552,742   | 13      | 450  | 2.89  |      |
| SLE | Bombali          | district   | 443,868   | 108     | 1212 | 9.82  |      |
| SLE | Bonthe           | district   | 148,892   | 1       | 5    | 20    |      |
| SLE | Kailahun         | district   | 409,182   | 101     | 756  | 13.36 |      |
| SLE | Kambia           | district   | 302,083   | 74      | 326  | 19.33 |      |
| SLE | Kenema           | district   | 563,021   | 75      | 553  | 13.56 |      |
| SLE | Koinadugu        | district   | 299,798   | 11      | 185  | 5.95  |      |
| SLE | Kono             | district   | 324,103   | 39      | 568  | 6.87  |      |
| SLE | Moyamba          | district   | 263,788   | 23      | 317  | 7.26  |      |
| SLE | Port Loko        | district   | 540,439   | 150     | 2208 | 6.75  |      |
| SLE | Pujehun          | district   | 278,897   | 9       | 68   | 13.24 |      |
| SLE | Tonkolili        | district   | 386,112   | 19      | 630  | 3.01  |      |
| SLE | Western Rural    | district   | 435,323   | 88      | 1736 | 4.84  |      |
| SLE | Western Urban    | district   | 528,224   | 152     | 3219 | 4.04  |      |
| SEN | Kédougou         | depart.    | 70,072    | 0       | 0    | NA    |      |
| SEN | Salémata         | depart.    | 19,887    | 0       | 0    | NA    |      |
| SEN | Saraya           | depart.    | 55,879    | 0       | 0    | NA    |      |
| SEN | Vélingara        | depart.    | 254,319   | 0       | 0    | NA    |      |
| SEN | Tambacounda      | depart.    | 259,657   | 0       | 0    | NA    |      |
| MLI | Kéniéba          | cercle     | 195,927   | 0       | 0    | NA    |      |
| MLI | Kita             | cercle     | 451,019   | 0       | 0    | NA    |      |
| MLI | Kangaba          | cercle     | 103,684   | 0       | 0    | NA    |      |
| MLI | Kati             | cercle     | 1,076,713 | 0       | 0    | NA    |      |
| MLI | Yanfolila        | cercle     | 217,429   | 0       | 0    | NA    |      |
| GNB | Gabu             | region     | 220,218   | 0       | 0    | NA    |      |
| GNB | Tombali          | region     | 102,893   | 0       | 0    | NA    |      |
| CIV | San-Pédro        | region     | 185,465   | 0       | 0    | NA    |      |
| CIV | Folon            | region     | 88,493    | 0       | 0    | NA    |      |
| CIV | Kabadougou       | region     | 212,545   | 0       | 0    | NA    |      |
| CIV | Cavally          | region     | 421,559   | 0       | 0    | NA    |      |
| CIV | Tonkpi           | region     | 946,740   | 0       | 0    | NA    |      |
| CIV | Bafing           | region     | 188,328   | 0       | 0    | NA    |      |
